# Supplementary material
Source: PubMed Central journal article supplement (PMC6420330)
Supplement: supp_7.1.E159_2018-0199-original-submission.pdf [file supp_7.1.E159_2018-0199-original-submission.pdf]

## INTRODUCTION

Preterm births (< 37 weeks gestation) account for more than 80% of all perinatal complications and deaths with increasing numbers of preterm infants born annually (1). In Canada, preterm birth represented 7.8% of all live births in 2010, compared to 6.6% in 1991 (1). Numbers have been increasing in other countries as well with France reporting a rate of 7.5% of all live births in 2016 compared with 6.0% in 1995 (2). In general, survival of infants born at less than 32 weeks of gestational age (GA) has improved in developed nations because of the widespread use of surfactant treatment for respiratory distress syndrome, antenatal glucocorticoids administration and new ventilator strategies (3–6). However, a review of published data from developed nations suggests that the outcomes of preterm infants can vary greatly between countries especially at the lower gestations (7,8). This is likely related to variations in practice and approach to the management of preterm births. It is extremely difficult to compare these differences via randomized control trials due to ethical concerns. However, many countries have developed large-scale databases/registries to track the birth and outcomes of preterm infants. This often includes in-depth information on maternal and neonatal variables, as well as elements surrounding obstetrical management and delivery. By utilizing these datasets, we are able to compare management approaches and outcomes of preterm infants between countries and determine if practice variations are associated with differences in outcomes. For this study, our primary objective was to compare the obstetrical interventions and rate of neonatal death of preterm deliveries ( $\leq 34$  weeks) in Ontario and France.

## METHODS

### *Study populations*

We compared two population-based birth cohorts: 1) the Better Outcomes Registry & Network (BORN) Information System representing Ontario, Canada, and 2) the Epidemiological Study on low gestational age infants cohort second cycle (EPIPAGE-2) representing France. Both data sources are described in more detail elsewhere (9,10). Relevant to the current study is that EPIPAGE-2 is a population based sample of very preterm infants ( $\leq 34$  completed gestational weeks) born between March and November 2011, whereas BORN Ontario is an ongoing birth registry that captures all births in the province of Ontario. Since the population of France is larger than Ontario, EPIPAGE-2 recruited a greater number of very preterm infants over a shorter period of time. For this reason, in creating the BORN Ontario cohort we included very preterm births over an 18-month period (April 2012 and December 2013). This period was chosen to provide sufficient statistical power, ensuring a minimum of 200 records per gestational week category. Any live born very preterm infant, born within the study periods were eligible for inclusion. Excluded were any infants with identified congenital anomalies.

### *Comorbidities and covariates*

We compared maternal characteristics such as age, BMI, morbidity (any chronic medical condition diagnosed prior to pregnancy such as psychiatric conditions, kidney disease, cardiac disease etc.), pregnancy related complications such as gestational diabetes and gestational hypertension, obstetrical characteristics such as multi-fetal gestation and delivery in an institution with a level of care 3 NICU, obstetrical interventions such as assisted reproductive therapy, caesarean section, induction of labor

1  
2  
3 and use of antenatal steroids, and neonatal characteristics such as birth weight and infant  
4 sex for women/infants who delivered at  $\leq 34$  weeks gestation. Gestational age was  
5  
6 categorized into 3 discrete groups: 1) 22-26 weeks, 2) 27-31 weeks and 3) 32-34 weeks  
7  
8 for ease of comparison of BORN Ontario to the EPIPAGE-2 cohort. To ensure complete  
9  
10 capture of all neonatal deaths at lower gestational ages in BORN, information on neonatal  
11  
12 deaths was supplemented with data from the Canadian Institute for Health Information  
13  
14 (11), a Canada-wide institute that independently collects health administrative data. Only  
15  
16 live born infants were used for descriptive characteristics and as the denominator for  
17  
18 analyzing neonatal deaths.  
19  
20  
21  
22  
23

### 24 *Statistical Analysis*

25  
26 To facilitate data analysis, EPIPAGE-2 data was securely transferred directly  
27  
28 from EPIPAGE-2 to BORN Ontario servers. Live births, still births and neonatal deaths  
29  
30 were stratified by gestational age, and summary statistics were used to represent  
31  
32 covariates stratified by gestational age groups between Ontario and France. Statistical  
33  
34 significance was determined using student's t-test or chi-square test of homogeneity. For  
35  
36 comparing the population based sample approach used by EPIPAGE-2 to BORN Ontario,  
37  
38 sample weighting was not necessary, as the comparisons are within gestational age  
39  
40 groups. As such the summary estimates are unbiased. However, for overall analyses that  
41  
42 combine gestational age groups, sample weightings are used. Neonatal death for all live  
43  
44 births was compared between EPIPAGE-2 and BORN using a sample-weighted crude  
45  
46 and multi-variable logistic regression models. Models were adjusted for clinically  
47  
48 important co-variables based on clinical rationale and results of the uni-variate analysis.  
49  
50  
51  
52  
53  
54 Data was adjusted in two stages, first for non-modifiable intrinsic characteristics,  
55  
56  
57  
58  
59  
60

1  
2  
3 including maternal age, maternal BMI, gestational hypertension, assisted reproductive  
4 technology, infant birth weight and multi-fetal pregnancy; and secondly, for variables  
5 related to obstetrical and neonatal care, including birth in a center with a level 3 NICU,  
6 antenatal corticosteroids and cesarean section for delivery. Un-weighted models were  
7 repeated within each gestational age group and for neonatal deaths occurring within 1 and  
8 5 months of birth.  
9

10  
11 Data management and analysis was performed using SAS version 9.4 (SAS  
12 Institute, Cary, NC) and statistical significance was evaluated with a two-sided p-value of  
13 0.05. The STROBE cohort reporting guidelines was used (9). This study was approved by  
14 the Research Ethics Boards of the University of Ottawa, and the Children's Hospital of  
15 Eastern Ontario. EPIPAGE-2 was approved by the National Data Protection Authority  
16 (CNIL no.911009) and by appropriate ethics committees. Funding was provided by a  
17 joint partnership between the University of Ottawa and the University of Paris Rene  
18 Descartes.  
19  
20  
21  
22  
23  
24  
25  
26  
27  
28  
29  
30  
31  
32  
33  
34  
35  
36  
37

## 38 **RESULTS**

39  
40 A total of 14,760 records were included in the study (8,278 from BORN and  
41 6,482 from EPIPAGE-2), consisting of 1,067 neonatal deaths (365 from BORN and 702  
42 from EPIPAGE-2), see Tables 1 and 2. Univariate comparisons of maternal/obstetrical  
43 and neonatal characteristics are shown in Table 3 and Table 4, respectively, stratified by  
44 gestational age. On average, mothers in the BORN cohort were older with higher BMI,  
45 but less likely to have gestational hypertension. Infants from EPIPAGE-2 had lower birth  
46 weights. There are also differences in other baseline characteristics such as multifetal  
47  
48  
49  
50  
51  
52  
53  
54  
55  
56  
57  
58  
59  
60

1  
2  
3 pregnancies and assisted reproductive therapy (ART) use especially at certain gestational  
4  
5 age groups.  
6

7  
8 In terms of obstetrical management, more women in France received completed  
9  
10 courses of antenatal steroids for infants born 27-34 weeks gestation. A greater number of  
11  
12 preterm infants were also born in hospitals with level 3 NICU care in France compared  
13  
14 with Ontario across all gestational ages. There were also differences in obstetrical  
15  
16 management of preterm births at certain gestational age groups. For example, France had  
17  
18 a higher rate of C-section above 27 weeks and Ontario had a higher rate of labour  
19  
20 induction below 32 weeks.  
21  
22

23  
24 The most important difference was the number of neonatal deaths as a proportion  
25  
26 of live births in Ontario and France. Figure 1 illustrates the proportion of neonatal death  
27  
28 per live birth at each gestational age in France as compared to Ontario. The figure  
29  
30 suggests that there is a higher proportion of neonatal death in France until 28 weeks  
31  
32 gestation, after which the numbers become similar. Table 5 demonstrates the crude and  
33  
34 adjusted odds ratios for neonatal death in EPIPAGE-2 as compared to BORN within 1  
35  
36 month and 5 months. After adjusting for intrinsic factors which were found to be  
37  
38 different between the two groups and may impact the rate of this outcome, there was a  
39  
40 significantly higher rate of neonatal death in France compared to Ontario from 22 weeks  
41  
42 to 31 completed weeks gestation with the difference being most pronounced at 22-26  
43  
44 weeks gestation despite adjustment for intrinsic population differences (aOR: 2.17;  
45  
46 95%CI: 1.59,2.94;  $p < 0.001$ ). This disparity became even more marked with further  
47  
48 adjustment for management variations including rate of cesarean section, birth in a center  
49  
50 with a level 3 NICU and rate of corticosteroid use (aOR: 2.51; 95% CI: 1.79, 3.51;  $p$   
51  
52  
53  
54  
55  
56  
57  
58  
59  
60

1  
2  
3 =<0.001). The majority of the deaths appear to have occurred within the first month.  
4  
5 There was also increased likelihood of death in the 27-31 week gestation infants,  
6  
7 however this is less pronounced and only after adjustment for both intrinsic factors and  
8  
9 management differences (aOR: 1.54; 95%CI: 1.01, 2.35; p<0.05). The deaths in the 27-  
10  
11 31 weeks age group appear to be more temporally spread out and do not reach  
12  
13 significance until all deaths occurring <5 month were included.  
14  
15  
16  
17  
18  
19  
20  
21  
22  
23  
24  
25  
26  
27  
28  
29  
30  
31  
32  
33  
34  
35  
36  
37  
38  
39  
40  
41  
42  
43  
44  
45  
46  
47  
48  
49  
50  
51  
52  
53  
54  
55  
56  
57  
58  
59  
60

Confidential

## INTERPRETATION

We found statistically significant differences in certain maternal and neonatal baseline characteristics across all gestational ages, including mean maternal age, BMI and infant birth weight. The higher birth weight in the Ontario cohort is likely related to higher maternal BMI. This, along with the greater average maternal age, is likely a reflection of intrinsic cultural/social difference between the populations. There were also some differences in the rates of gestational hypertension, ART use and multifetal pregnancy with France having higher rates. At the time of the two cohorts, France appears to have had better insurance coverage for patients seeking ART treatments. The higher proportion of ART could explain the higher rates of multifetal pregnancies. Both IVF and multifetal pregnancies are associated with higher pregnancy related complications such as gestational hypertension (10,11). There were also a greater number of deliveries occurring in centers with level 3 NICUs in France. Ontario has nearly twice the land area of France with the majority of level 3 NICUs located in the southern part of the province. This large geographic area can make transport of laboring mothers to a level 3 NICU more challenging.

The most interesting finding is the increased number of neonatal deaths especially at the lowest gestational ages despite adjustments. To verify the data we also compared our BORN Ontario cohort to the 2014 Canadian Neonatal Network (CNN) annual report which is a database of preterm infants admitted to level 3 centers across Canada (12). While Ontario NICUs make up a larger number of the sites included in the CNN data, the data is collected separately from the BORN data (14). We also verified the EPIPAGE-2 numbers with the literature (13). This is supported our findings that the French and

1  
2  
3 Ontario cohorts do not approach similar survival rates until 28 weeks gestation (Figure  
4  
5 1).

6  
7  
8 Previous studies have compared the morbidity and mortality of preterm infants in  
9  
10 developed nations and found significant variations despite similar access to available  
11  
12 technology and expertise (14–16). A recently published article by Helenius et al.  
13  
14 comparing the survival rates of 10 neonatal networks found marked differences in  
15  
16 mortality at the lower gestational ages with the difference diminishing as the gestational  
17  
18 age increased (8). One possible explanation for the significant disparity in survival at the  
19  
20 lower gestational ages, despite adjustments for intrinsic population differences followed  
21  
22 by differences in management may be related to differing beliefs regarding the  
23  
24 “survivability” of extreme preterm infants (17). In a previous publication using  
25  
26 EPIPAGE-2 data, intensive care was withheld or withdrawn for > 90% of live-born  
27  
28 infants between 22-23 weeks gestation, 38% at 24 weeks, 8% at 25 weeks and 3% at 26  
29  
30 weeks (18). While we do not have specific data for the Ontario cohort, the 2014 CNN  
31  
32 annual report indicated that only 43.9% of babies born at 22-23 weeks received palliative  
33  
34 care, 4.9% of babies born at 24 weeks, 1.2% at 25 weeks and 0.6% at 26 weeks (12).  
35  
36  
37 Thus, there is a potential difference in approach to the resuscitation and early  
38  
39 management of extreme preterm infants between France and Canada. Smith et. al.  
40  
41 evaluated if the approach taken by care centers at 22-24 weeks is predictive of outcomes  
42  
43 (19). They concluded that a physician’s willingness to provide care to extremely low  
44  
45 gestation infants is associated with improved outcome. The marker they found to be  
46  
47 most indicative of an intention to provide aggressive care is the use of antenatal steroids.  
48  
49  
50 However, in our results, there was no difference in the rate of antenatal steroid  
51  
52  
53  
54  
55  
56  
57  
58  
59  
60



1  
2  
3 administration in the lowest gestation group and higher steroid administration in France  
4  
5 for the higher gestations. France also did better in delivering premature babies in a center  
6  
7 with a level 3 NICU. Thus the EPIPAGE-2 cohort actually received more aggressive  
8  
9 management on average antenatally based on the variables we collected. It is possible  
10  
11 the difference in attitudes towards the outcomes of these preterm infants occurs after  
12  
13 post-delivery assessment. This may have been reflected in our finding that the majority of  
14  
15 the deaths occurred within the first month of life. In the original EPIPAGE-1 cohort,  
16  
17 there was a higher probability of death after active withdrawal in France versus the UK  
18  
19 (20). In a single center study published in 2005, it was found that majority (> 70%) of  
20  
21 newborn death in the center were a result of withdrawal of care in cases deemed “futile”  
22  
23 (21).  
24  
25  
26  
27

28  
29 Through this study, we were able to compare obstetrical management and survival  
30  
31 of two very large cohorts of preterm infants born over a similar time period. Limitations  
32  
33 include the retrospective nature of the comparison. We were also unable to compare the  
34  
35 exact cause of death and major morbidity of the babies during their NICU stay and long  
36  
37 term neurodevelopmental outcomes.  
38  
39

40  
41 In summary, despite controlling for prognostic factors and differences in  
42  
43 obstetrical management, there appears to be a significant difference in the survival of  
44  
45 infants born  $\leq 31$  weeks gestation (in particular those  $\leq 26$  weeks) in France and Ontario  
46  
47 with a greater proportion of live born infants surviving in Ontario. Further work will  
48  
49 need to be done to explore the long-term outcomes of surviving infants and the cause for  
50  
51 the difference in survival given that both France and Ontario have access to similar  
52  
53  
54  
55  
56  
57  
58  
59  
60

1  
2  
3  
4  
5  
6  
7  
8  
9  
10  
11  
12  
13  
14  
15  
16  
17  
18  
19  
20  
21  
22  
23  
24  
25  
26  
27  
28  
29  
30  
31  
32  
33  
34  
35  
36  
37  
38  
39  
40  
41  
42  
43  
44  
45  
46  
47  
48  
49  
50  
51  
52  
53  
54  
55  
56  
57  
58  
59  
60

technologies. We postulate that perhaps this could be in part due to differences in the beliefs of care providers towards the perceived survivability of these infants.

Confidential

**REFERENCES**

1. Blencowe H, Cousens S, Oestergaard MZ, Chou D, Moller A-B, Narwal R, et al. National, regional, and worldwide estimates of preterm birth rates in the year 2010 with time trends since 1990 for selected countries: a systematic analysis and implications. *Lancet* [Internet]. 2012;379(9832):2162–72. Available from: <http://www.sciencedirect.com/science/article/pii/S0140673612608204>
2. Blondel B, Coulm B, Bonnet C, Goffinet F, Le Ray C. Trends in perinatal health in metropolitan France from 1995 to 2016: Results from the French National Perinatal Surveys. *J Gynecol Obstet Hum Reprod*. 2017;46(10):701–13.
3. Costeloe KL, Hennessy EM, Haider S, Stacey F, Marlow N, Draper ES. Short term outcomes after extreme preterm birth in England: comparison of two birth cohorts in 1995 and 2006 (the EPICure studies). *BMJ* [Internet]. 2012;345:e7976. Available from: <http://www.pubmedcentral.nih.gov/articlerender.fcgi?artid=3514472&tool=pmcentrez&rendertype=abstract>
4. Fellman V, Hellström-Westas L, Norman M, Westgren M, Källén K, Lagercrantz H, et al. One-year survival of extremely preterm infants after active perinatal care in Sweden. *JAMA*. 2009;301:2225–33.
5. Zeitlin J, Ancel P-Y, Delmas D, Bréart G, Papiernik E. Changes in care and outcome of very preterm babies in the Parisian region between 1998 and 2003. *Arch Dis Child Fetal Neonatal Ed*. 2010;95:F188–93.
6. Field DJ, Dorling JS, Manktelow BN, Draper ES. Survival of extremely premature babies in a geographically defined population: prospective cohort study of 1994-9

- 1  
2  
3 compared with 2000-5. *BMJ*. 2008;336:1221–3.  
4  
5  
6 7. Draper ES, Zeitlin J, Fenton AC, Weber T, Gerrits J, Martens G, et al.  
7  
8 Investigating the variations in survival rates for very preterm infants in 10  
9  
10 European regions: the MOSAIC birth cohort. *Arch Dis Child - Fetal Neonatal Ed*  
11  
12 [Internet]. 2008;94(3):F158–63. Available from:  
13  
14 <http://fn.bmj.com/cgi/doi/10.1136/adc.2008.141531>  
15  
16  
17 8. Helenius K, Sjörs G, Shah PS, Modi N, Reichman B, Morisaki N, et al. Survival in  
18  
19 Very Preterm Infants: An International Comparison of 10 National Neonatal  
20  
21 Networks. *Pediatrics* [Internet]. 2017;140(6):e20171264. Available from:  
22  
23 <http://www.ncbi.nlm.nih.gov/pubmed/29162660>  
24  
25  
26 9. von Elm E, Altman DG, Egger M, Pocock SJ, Gøtzsche PC, Vandenbroucke JP.  
27  
28 The Strengthening the Reporting of Observational Studies in Epidemiology  
29  
30 (STROBE) statement: guidelines for reporting observational studies. *J Clin*  
31  
32 *Epidemiol*. 2008;61(4):344–9.  
33  
34  
35 10. Sibai BM, Hauth J, Caritis S, Lindheimer MD, MacPherson C, Klebanoff M, et al.  
36  
37 Hypertensive disorders in twin versus singleton gestations. National Institute of  
38  
39 Child Health and Human Development Network of Maternal-Fetal Medicine  
40  
41 Units. *Am J Obstet Gynecol*. 2000;182(4):938–42.  
42  
43  
44 11. Opdahl S, Henningsen AA, Tiitinen A, Bergh C, Pinborg A, Romundstad PR, et al.  
45  
46 Risk of hypertensive disorders in pregnancies following assisted reproductive  
47  
48 technology: A cohort study from the CoNARTaS group. *Hum Reprod*.  
49  
50 2015;30(7):1724–31.  
51  
52  
53 12. Shah, Prakesh S.; Yoon, Eugene W.; Chan PM of the ARRC. The Canadian  
54  
55  
56  
57  
58  
59  
60

- 1  
2  
3 Neonatal Network Annual Report [Internet]. 2014. Available from:  
4  
5 <http://www.canadianneonatalnetwork.org/Portal/LinkClick.aspx?fileticket=eGgxm>  
6  
7 [Mubxjk%3D&tabid=39](http://www.canadianneonatalnetwork.org/Portal/LinkClick.aspx?fileticket=eGgxmMubxjk%3D&tabid=39)  
8  
9
- 10 13. Ancel P-Y, Goffinet F, Kuhn P, Langer B, Matis J, Hernandorena X, et al.  
11  
12 Survival and morbidity of preterm children born at 22 through 34 weeks' gestation  
13  
14 in France in 2011: results of the EPIPAGE-2 cohort study. *JAMA Pediatr*  
15  
16 [Internet]. 2015;169(3):230–8. Available from:  
17  
18 <http://www.ncbi.nlm.nih.gov/pubmed/25621457>  
19  
20
- 21 14. Isayama T, Lee SK, Mori R, Kusuda S, Fujimura M, Ye XY, et al. Comparison of  
22  
23 Mortality and Morbidity of Very Low Birth Weight Infants Between Canada and  
24  
25 Japan. *Pediatrics* [Internet]. 2012;130(4):e957–65. Available from:  
26  
27 <http://www.ncbi.nlm.nih.gov/pubmed/22966031>  
28  
29
- 30 15. Shah PS, Lui K, Sjörs G, Mirea L, Reichman B, Adams M, et al. Neonatal  
31  
32 Outcomes of Very Low Birth Weight and Very Preterm Neonates: An  
33  
34 International Comparison. *J Pediatr* [Internet]. 2016; Available from:  
35  
36 <http://linkinghub.elsevier.com/retrieve/pii/S0022347616301937>  
37  
38  
39
- 40 16. Su BH, Hsieh WS, Hsu CH, Chang JH, Lien R, Lin CH. Neonatal outcomes of  
41  
42 extremely preterm infants from Taiwan: Comparison with Canada, Japan, and the  
43  
44 USA. *Pediatr Neonatol*. 2015;56(1):46–52.  
45  
46
- 47 17. Gallagher K, Aladangady N, Marlow N. The attitudes of neonatologists towards  
48  
49 extremely preterm infants: A Q methodological study. *Arch Dis Child Fetal*  
50  
51 *Neonatal Ed*. 2016;101(1):F31–6.  
52  
53
- 54 18. Perlberg J, Ancel PY, Khoshnood B, Durox M, Boileau P, Garel M, et al. Delivery  
55  
56  
57  
58  
59  
60

- 1  
2  
3 room management of extremely preterm infants: the EPIPAGE-2 study. Arch Dis  
4 Child Fetal Neonatal Ed [Internet]. 2016;PubAh:1–8. Available from:  
5  
6 [http://fn.bmj.com/content/early/2016/02/02/archdischild-2015-](http://fn.bmj.com/content/early/2016/02/02/archdischild-2015-308728.abstract%5Cnhttp://fn.bmj.com/lookup/doi/10.1136/archdischild-2015-308728%5Cnhttp://www.ncbi.nlm.nih.gov/pubmed/26837310)  
7  
8  
9  
10  
11  
12  
13  
14  
15 19. Smith PB, Ambalavanan N, Li L, Cotten CM, Laughon M, Walsh MC, et al.  
16  
17 Approach to infants born at 22 to 24 weeks' gestation: relationship to outcomes of  
18  
19 more-mature infants. Pediatrics [Internet]. 2012;129(6):e1508-16. Available from:  
20  
21 [http://www.pubmedcentral.nih.gov/articlerender.fcgi?artid=3362905&tool=pmcen](http://www.pubmedcentral.nih.gov/articlerender.fcgi?artid=3362905&tool=pmcentrez&rendertype=abstract)  
22  
23  
24  
25  
26 20. Pignotti MS, Berni R. Extremely preterm births: end-of-life decisions in European  
27  
28 countries. Arch Dis Child Fetal Neonatal Ed. 2010;95(4):F273–6.  
29  
30  
31 21. Barton L, Hodgman JE. The contribution of withholding or withdrawing care to  
32  
33 newborn mortality. Pediatrics. 2005;116(6):1487–91.  
34  
35  
36  
37  
38  
39  
40  
41  
42  
43  
44  
45  
46  
47  
48  
49  
50  
51  
52  
53  
54  
55  
56  
57  
58  
59  
60

**Table 1: Ontario Births by Gestational Age (April 2012-December 2013)**

| Gestational Age | Total Births | Still Births* | Live Births | Neonatal Deaths** |
|-----------------|--------------|---------------|-------------|-------------------|
| 22              | 172          | 82 (47.6)     | 90          | 68 (75.6)         |
| 23              | 195          | 58 (29.7)     | 137         | 89 (65.0)         |
| 24              | 210          | 40 (19.0)     | 170         | 57 (33.5)         |
| 25              | 273          | 43 (15.7)     | 230         | 34 (14.8)         |
| 26              | 270          | 29 (10.7)     | 241         | 26 (10.8)         |
| 22-26           | 1120         | 252           | 868         | 274               |
| 27              | 296          | 28 (9.5)      | 268         | 21 (7.8)          |
| 28              | 298          | 23 (7.7)      | 275         | 7 (2.5)           |
| 29              | 402          | 48 (11.9)     | 354         | 13 (3.7)          |
| 30              | 499          | 18 (3.6)      | 481         | 6 (1.2)           |
| 31              | 731          | 35 (4.8)      | 696         | 10 (1.4)          |
| 27-31           | 2226         | 152           | 2074        | 57                |
| 32              | 1000         | 39 (3.9)      | 961         | 12 (1.2)          |
| 33              | 1474         | 38 (2.6)      | 1436        | 13 (0.9)          |
| 34              | 2458         | 45 (1.8)      | 2413        | 9 (0.4)           |
| 32-34           | 4932         | 122           | 4810        | 34                |
| <b>Total</b>    | <b>8278</b>  | <b>526</b>    | <b>7752</b> | <b>365</b>        |

\* In brackets is percentage of still birth with a denominator of total birth for each gestational age group

\*\* In brackets is percentage of neonatal death with a denominator of live birth for each gestational age group

**Table 2: France Births by Gestational Age (March 2011-November 2011)**

| Gestational Age | Total Births | Still Births* | Live Births | Neonatal Deaths** |
|-----------------|--------------|---------------|-------------|-------------------|
| 22              | 377          | 319 (84.6)    | 58          | 58 (100.0)        |
| 23              | 371          | 282 (76.0)    | 89          | 88 (98.9)         |
| 24              | 364          | 178 (48.9)    | 186         | 128 (68.8)        |
| 25              | 407          | 99 (24.3)     | 308         | 126 (40.9)        |
| 26              | 498          | 85 (17.1)     | 413         | 102 (24.7)        |
| 22-26           | 2017         | 963           | 1054        | 502               |
| 27              | 467          | 67 (14.3)     | 400         | 71 (17.8)         |
| 28              | 520          | 63 (12.1)     | 457         | 46 (10.1)         |
| 29              | 557          | 48 (8.6)      | 509         | 23 (4.5)          |
| 30              | 756          | 75 (9.9)      | 681         | 21 (3.1)          |
| 31              | 931          | 69 (7.4)      | 862         | 26 (3.0)          |
| 27-31           | 3231         | 322           | 2909        | 187               |
| 32              | 281          | 10 (3.6)      | 271         | 5 (1.8)           |
| 33              | 363          | 9 (2.5)       | 354         | 3 (0.8)           |
| 34              | 590          | 9 (1.5)       | 581         | 5 (0.9)           |
| 32-34           | 1234         | 28            | 1206        | 13                |
| <b>Total</b>    | <b>6482</b>  | <b>1313</b>   | <b>5169</b> | <b>702</b>        |

\* In brackets is percentage of still birth with a denominator of total birth for each gestational age group

\*\* In brackets is percentage of neonatal death with a denominator of live birth for each gestational age group



**Table 3: Maternal/Obstetrical Characteristics Stratified by Gestational Age**

| Mothers who gave birth to live born infants | ONTARIO<br>(N=6,543) | FRANCE<br>(N=4,300) | P value |
|---------------------------------------------|----------------------|---------------------|---------|
| Maternal Age (mean, sd)                     |                      |                     |         |
| 22-26 week                                  | 30.43 (5.98)         | 29.10 (5.96)        | <0.001  |
| 27-31 week                                  | 31.08 (6.01)         | 29.67 (6.04)        | <0.001  |
| 32-34 week                                  | 30.67 (5.85)         | 29.94 (5.54)        | <0.001  |
| BMI (mean, sd)                              |                      |                     |         |
| 22-26 week                                  | 26.75 (7.48)         | 24.42 (5.65)        | <0.001  |
| 27-31 week                                  | 26.19 (6.81)         | 24.44 (5.64)        | <0.001  |
| 32-34 week                                  | 25.71 (6.74)         | 23.97 (5.49)        | <0.001  |
| Morbidity (n, col %*)                       |                      |                     |         |
| 22-26 week                                  | 350 (47.36)          | 436 (49.32)         | 0.431   |
| 27-31 week                                  | 770 (46.03)          | 1114 (45.71)        | 0.843   |
| 32-34 week                                  | 1756 (44.74)         | 447 (45.66)         | 0.605   |
| Gestational Diabetes (n, col %*)            |                      |                     |         |
| 22-26 week                                  | 21 (3.49)            | 31 (3.88)           | 0.702   |
| 27-31 week                                  | 120 (8.50)           | 190 (8.45)          | 0.961   |
| 32-34 week                                  | 323 (9.13)           | 88 (9.78)           | 0.549   |
| Gestational Hypertension (n, col %*)        |                      |                     |         |
| 22-26 week                                  | 52 (8.51)            | 104 (11.76)         | 0.043   |
| 27-31 week                                  | 236 (16.65)          | 585 (24.00)         | <0.001  |
| 32-34 week                                  | 541 (14.93)          | 175 (17.88)         | 0.024   |
| Assisted Reproductive Therapy (n, col %*)   |                      |                     |         |
| 22-26 week                                  | 83 (11.66)           | 130 (15.40)         | 0.032   |
| 27-31 week                                  | 186 (11.50)          | 266 (11.32)         | 0.862   |
| 32-34 week                                  | 388 (10.06)          | 122 (12.90)         | 0.011   |
| Cesarean Section (n, col %*)                |                      |                     |         |
| 22-26 week                                  | 285 (37.30)          | 316 (36.41)         | 0.707   |
| 27-31 week                                  | 980 (56.39)          | 1671 (69.34)        | <0.001  |
| 32-34 week                                  | 1924 (47.61)         | 523 (53.97)         | <0.001  |
| Induction of Labour (n, col %*)             |                      |                     |         |
| 22-26 week                                  | 60 (7.85)            | 28 (3.24)           | <0.001  |
| 27-31 week                                  | 53 (3.05)            | 41 (1.75)           | 0.006   |
| 32-34 week                                  | 431 (10.67)          | 94 (9.98)           | 0.536   |
| Multifetal pregnancy (n, col %*)            |                      |                     |         |
| 22-26 week                                  | 103 (13.48)          | 167 (18.89)         | <0.001  |
| 27-31 week                                  | 308 (17.72)          | 455 (18.67)         | 0.541   |
| 32-34 week                                  | 743 (18.39)          | 219 (22.37)         | <0.001  |
| Antenatal Steroids (n, col %*)              |                      |                     |         |
| 22-26 week                                  | 444 (60.33)          | 552 (64.71)         | 0.070   |
| 27-31 week                                  | 1292 (78.30)         | 1987 (83.17)        | <0.001  |
| 32-34 week                                  | 1728 (45.43)         | 685 (71.58)         | <0.001  |
| Level of Care III (n, col %*)               |                      |                     |         |
| 22-26 week                                  | 513 (68.04)          | 704 (79.64)         | <0.001  |
| 27-31 week                                  | 1112 (64.43)         | 2064 (84.69)        | <0.001  |
| 32-34 week                                  | 1186 (29.52)         | 490 (50.05)         | <0.001  |
| Birth weight (mean, sd)**                   |                      |                     |         |
| 22-26 week                                  | 906 (710)            | 748 (161)           | <0.001  |
| 27-31 week                                  | 1408 (423)           | 1275 (326)          | <0.001  |
| 32-34 week                                  | 2123 (458)           | 1982 (384)          | <0.001  |
| Male Gender (n, col %)**                    |                      |                     |         |
| 22-26 week                                  | 489 (56.34)          | 558 (52.99)         | 0.143   |
| 27-31 week                                  | 1131 (54.64)         | 1537 (52.84)        | 0.209   |
| 32-34 week                                  | 2666 (55.50)         | 647 (53.69)         | 0.261   |

\* Col % = column percentage, calculated with a denominator of mothers within the respective gestational age group.

\*\* Col % = column percentage, calculated with a denominator of infants within the respective gestational age group.

1  
2  
3  
4  
5  
6  
7  
8  
9  
10  
11  
12  
13  
14  
15  
16  
17  
18  
19  
20  
21  
22  
23  
24  
25  
26  
27  
28  
29  
30  
31  
32  
33  
34  
35  
36  
37  
38  
39  
40  
41  
42  
43  
44  
45  
46  
47  
48  
49  
50  
51  
52  
53  
54  
55  
56  
57  
58  
59  
60

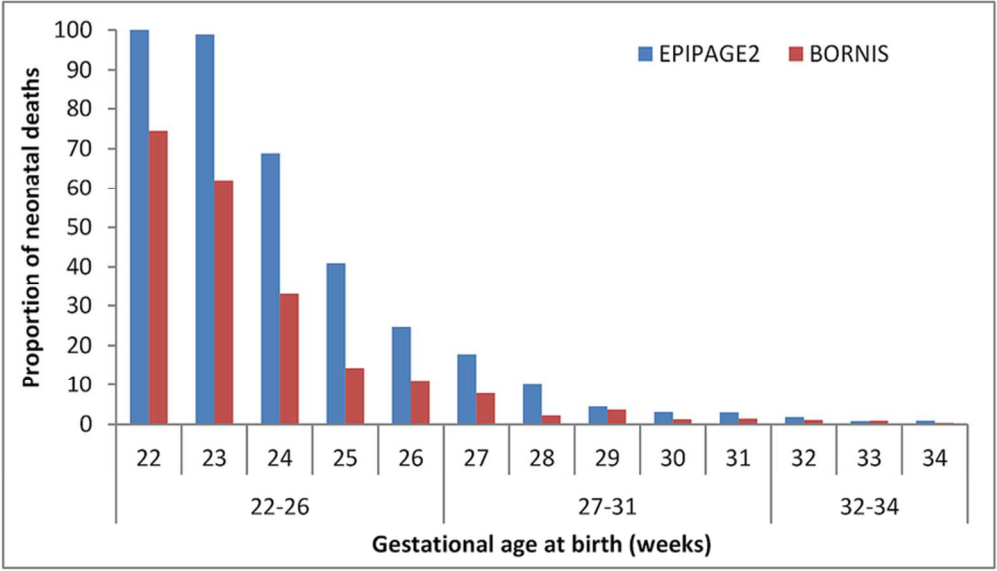

Figure 1: Comparison of crude rates of neonatal death per live born infants at each gestational age.

72x41mm (300 x 300 DPI)

**Table 4: Logistic regression model comparing neonatal deaths in France and Ontario.**

|                                                | Number of neonatal deaths |        | Unadjusted Odds ratios            | Adjusted Odds ratios*                 | Adjusted Odds ratios**                |
|------------------------------------------------|---------------------------|--------|-----------------------------------|---------------------------------------|---------------------------------------|
|                                                | Ontario                   | France | (95%CI) p value                   | (95%CI) p value                       | (95%CI) p value                       |
| Any neonatal deaths†                           | 356                       | 702    | 1.47 (0.94, 2.28) p =0.088        | 1.31 (0.65, 2.63) p =0.455            | 1.61 (0.76, 3.42) p =0.215            |
| Neonatal deaths within 1 month†                | 344                       | 638    | 1.36 (0.86, 2.13) p =0.185        | 1.20 (0.59, 2.45) p =0.622            | 1.54 (0.71, 3.34) p =0.279            |
| Neonatal deaths within 5 months†               | 356                       | 696    | 1.46 (0.94, 2.26) p =0.096        | 1.29 (0.64, 2.60) p =0.472            | 1.59 (0.75, 3.38) p =0.225            |
| Neonatal deaths for births between 22-26 weeks | 267                       | 502    | <b>2.05 (1.09, 3.83) p =0.025</b> | <b>2.17 (1.59, 2.94) p =&lt;.0001</b> | <b>2.51 (1.79, 3.51) p =&lt;.0001</b> |
| Neonatal deaths within 1 month                 | 259                       | 470    | <b>1.89 (1.01, 3.56) p =0.048</b> | <b>1.96 (1.44, 2.68) p =&lt;.0001</b> | <b>2.28 (1.62, 3.21) p =&lt;.0001</b> |
| Neonatal deaths within 5 months                | 267                       | 497    | <b>2.01 (1.07, 3.76) p =0.029</b> | <b>2.12 (1.56, 2.88) p =&lt;.0001</b> | <b>2.43 (1.73, 3.41) p =&lt;.0001</b> |
| Neonatal deaths for births between 27-31 weeks | 56                        | 187    | 2.48 (0.86, 7.13) p =0.093        | 1.46 (0.98, 2.18) p =0.064            | <b>1.54 (1.01, 2.35) p =0.047</b>     |
| Neonatal deaths within 1 month                 | 53                        | 157    | 2.18 (0.73, 6.49) p =0.164        | 1.31 (0.86, 1.98) p =0.208            | 1.43 (0.92, 2.23) p =0.111            |
| Neonatal deaths within 5 months                | 56                        | 186    | 2.46 (0.85, 7.09) p =0.096        | 1.45 (0.97, 2.17) p =0.068            | <b>1.54 (1.01, 2.35) p =0.047</b>     |
| Neonatal deaths for births between 32-34 weeks | 33                        | 13     | 1.58 (0.39, 6.46) p =0.526        | 1.40 (0.67, 2.95) p =0.373            | 0.92 (0.42, 1.99) p =0.823            |
| Neonatal deaths within 1 month                 | 32                        | 11     | 1.37 (0.32, 5.84) p =0.667        | 1.21 (0.54, 2.69) p =0.645            | 0.82 (0.36, 1.87) p =0.631            |
| Neonatal deaths within 5 months                | 33                        | 13     | 1.58 (0.39, 6.46) p =0.526        | 1.40 (0.67, 2.95) p =0.373            | 0.92 (0.42, 1.99) p =0.823            |

\*Models adjusted for maternal age, maternal BMI, gestational hypertension, assisted reproductive therapy, infant birthweight and multifetal pregnancy.

\*\* Models additionally adjusted for the cesarean section mode of delivery, antenatal steroid use, and delivery in a hospital institute with a level of care III rating

† Regression models weighted to account for stratified sampling methodology used by EPIPAGE in setting up the France cohort.
